# Supplementary material for: Rapid Warming, Acidification, Greening and Deoxygenation in the Global Coastal Ocean
Source: Research Square preprint supplement (doi:10.21203/rs.3.rs-8095752/v1), 2025-12-19
Supplement: Supplementary file 1 [file 4b16b1f5dff487cce184901c.pdf]

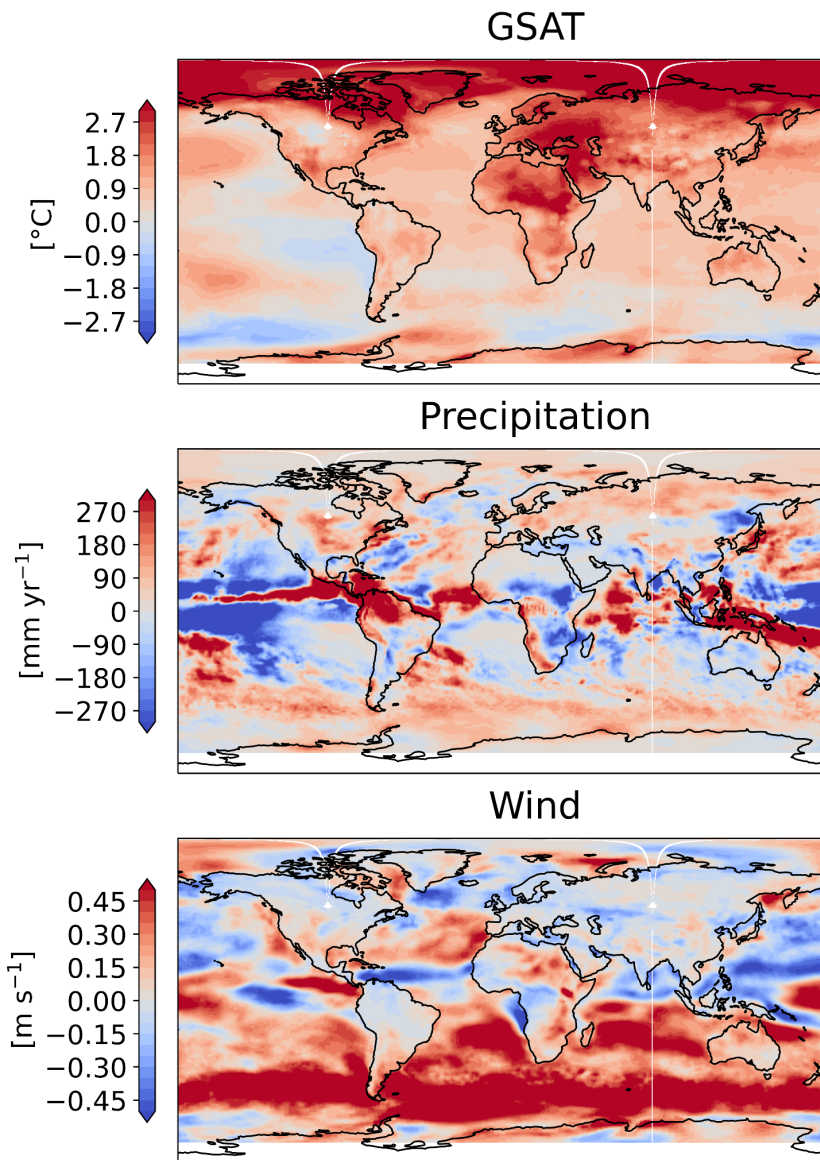

**Supplement Figure S1. Spatial distribution of 1980-2022 changes in major atmospheric variables.** Changes in global surface atmospheric temperature (GSAT), precipitation and wind speed change over 1980-2022 derived from linear trends using the ERA-20C (1900-2010) product, and extended with ERA5 (2011-2022) reanalysis product.

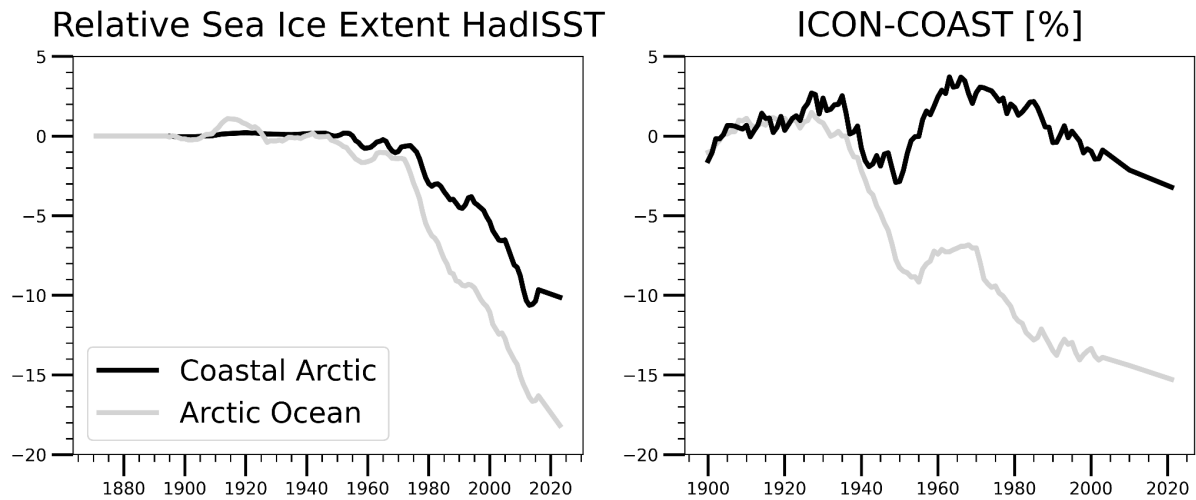

**Supplement Figure S2. Modelled and observed evolution of coastal and open water Arctic sea ice.** Relative changes in Arctic coastal and open water sea ice extent based on the observational dataset HadISST and the model ICON-COAST.

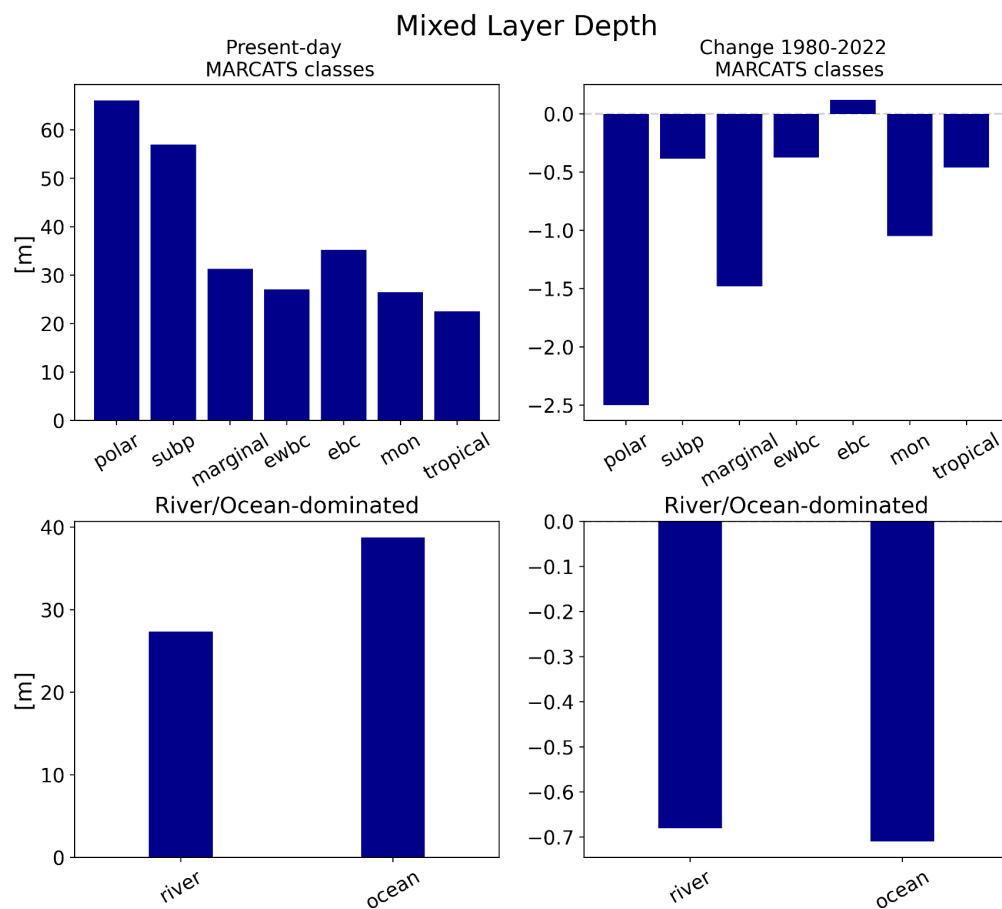

**Supplement Figure S3. Present day mixed layer depths and their 1980-2022 changes for different coastal classes.** Panel a and b shows simulated present-day (2000-2022 average) mean surface temperature and their 1980-2022 change for major high-level MARCATS coastal classes derived from linear trend: eastern boundary current (ebc), western boundary current (ewbc), monsoonal (mon), subpolar (subp), polar, marginal and tropical as defined in Laruelle et al. (2013) based on catchment properties. Panel c and d show the same variables for defined river/ocean-dominated shelves. We thereby computed means from ICON-COAST and HAMOCC-RIVER.

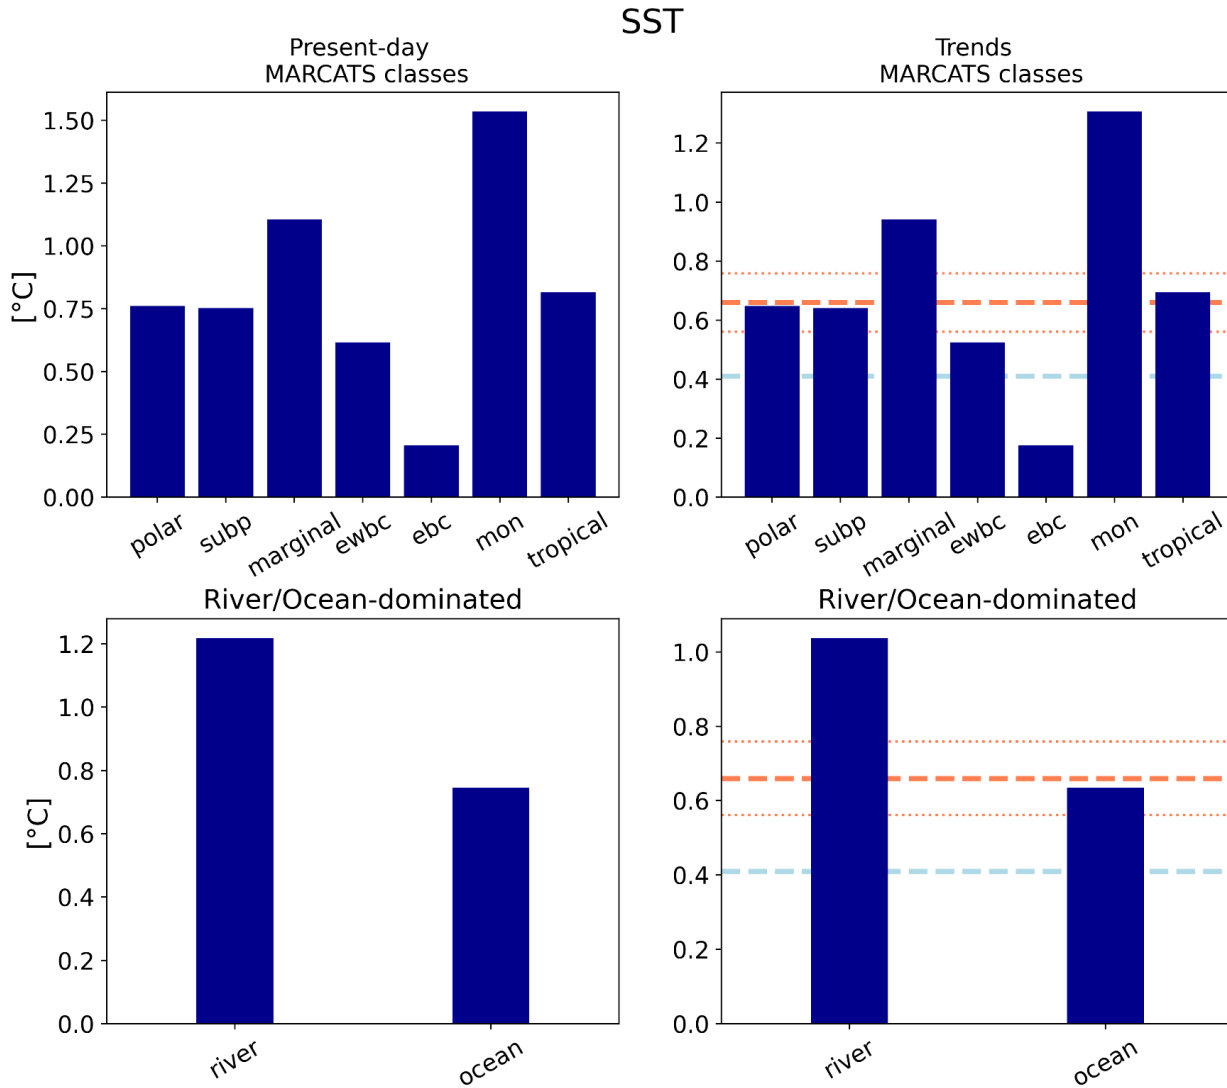

**Supplement Figure S4. Present day SST and their 1980-2022 changes in different coastal classes.** Panel a and b shows simulated present-day (2010-2020 average) mean surface temperature and their 1980-2022 change for major high-level MARCATS coastal classes: eastern boundary current (ebc), western boundary current (ewbc), monsoonal (mon), subpolar (subp), polar, marginal and tropical as defined in Laruelle et al. (2013) based on catchment properties. Panel c and d show the same variables for defined river/open ocean-dominated shelves. We thereby computed the mean from ICON-COAST and HAMOCC. Red dashed lines show coastal ocean means, dotted lines the 15% deviations from the coastal ocean means, and dashed blue the open ocean mean.

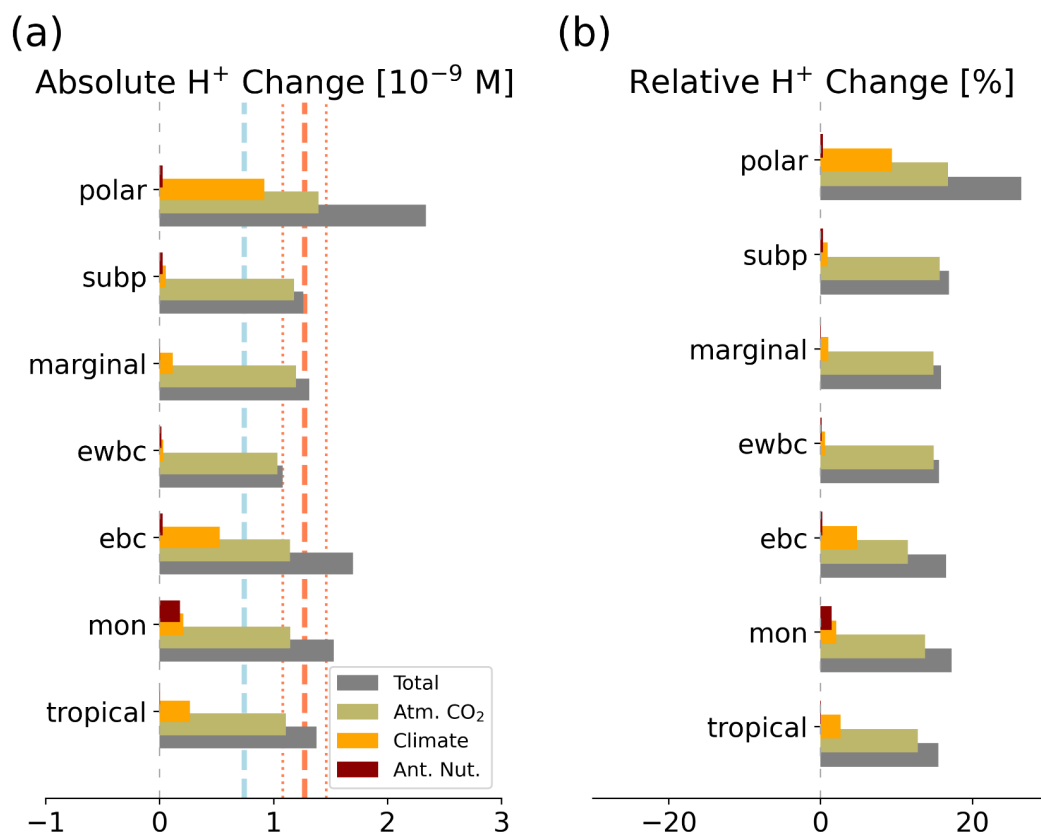

**Supplement Figure S5. Absolute (panel a) and relative (panel b) total changes in  $H^+$  over 1980-2022.** We show total 1980-2022 changes and those driven by climate and anthropogenic nutrients (Ant. Nut.) perturbations for the major high-level MARCATS coastal classes derived from linear trend: eastern boundary current (ebc), western boundary current (ewbc), monsoonal (mon), subpolar (subp), polar, marginal and tropical. Red dashed lines show coastal ocean

means, dotted lines the 15% deviations from the coastal ocean means, and dashed blue the open ocean mean.

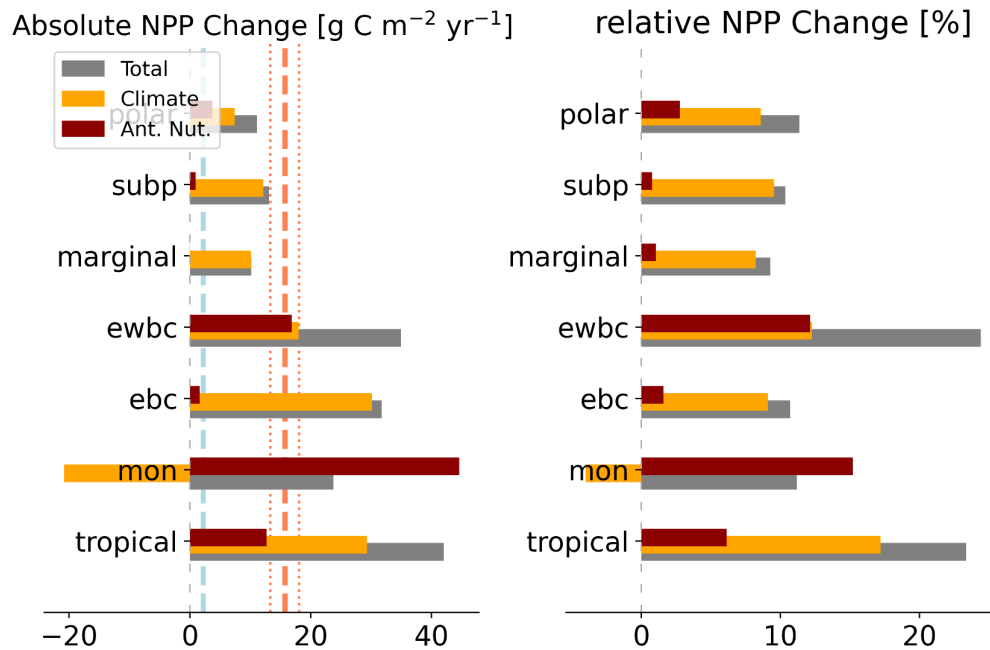

**Supplement Figure S6. Absolute (panel a) and relative (panel b) total changes in NPP over 1980-2022.** We show total changes, as well as those only driven by climate and anthropogenic nutrients (Ant. Nut.) perturbations for the major high-level MARCATS coastal classes derived from linear trend: eastern boundary current (ebc), western boundary current (ewbc), monsoonal (mon), subpolar (subp), polar, marginal and tropical. Red dashed lines show coastal ocean means, dotted lines the 15% deviations from the coastal ocean means, and dashed blue the open ocean mean.

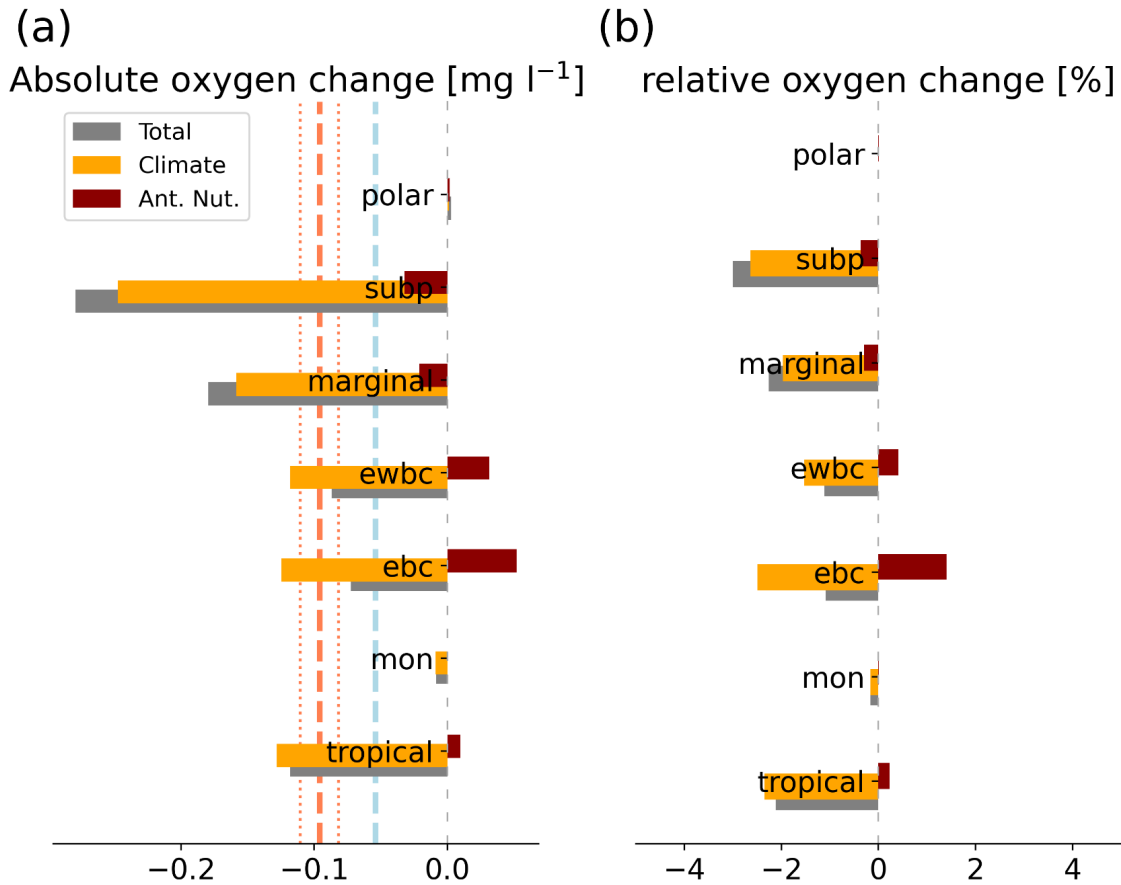

**Supplement Figure S7. Absolute (panel a) and relative changes (panel b) in  $\text{O}_2$  over 1980-2022.** We show total 1980-2022 changes, as well as those driven by climate and river-induced perturbations for the major high-level MARCATS coastal classes derived from linear trend: eastern boundary current (ebc), western boundary current (ewbc), monsoonal (mon), subpolar (subp), polar, marginal and tropical. Red dashed lines show coastal ocean means, dotted lines the 15% deviations from the coastal ocean means, and dashed blue the open ocean mean.

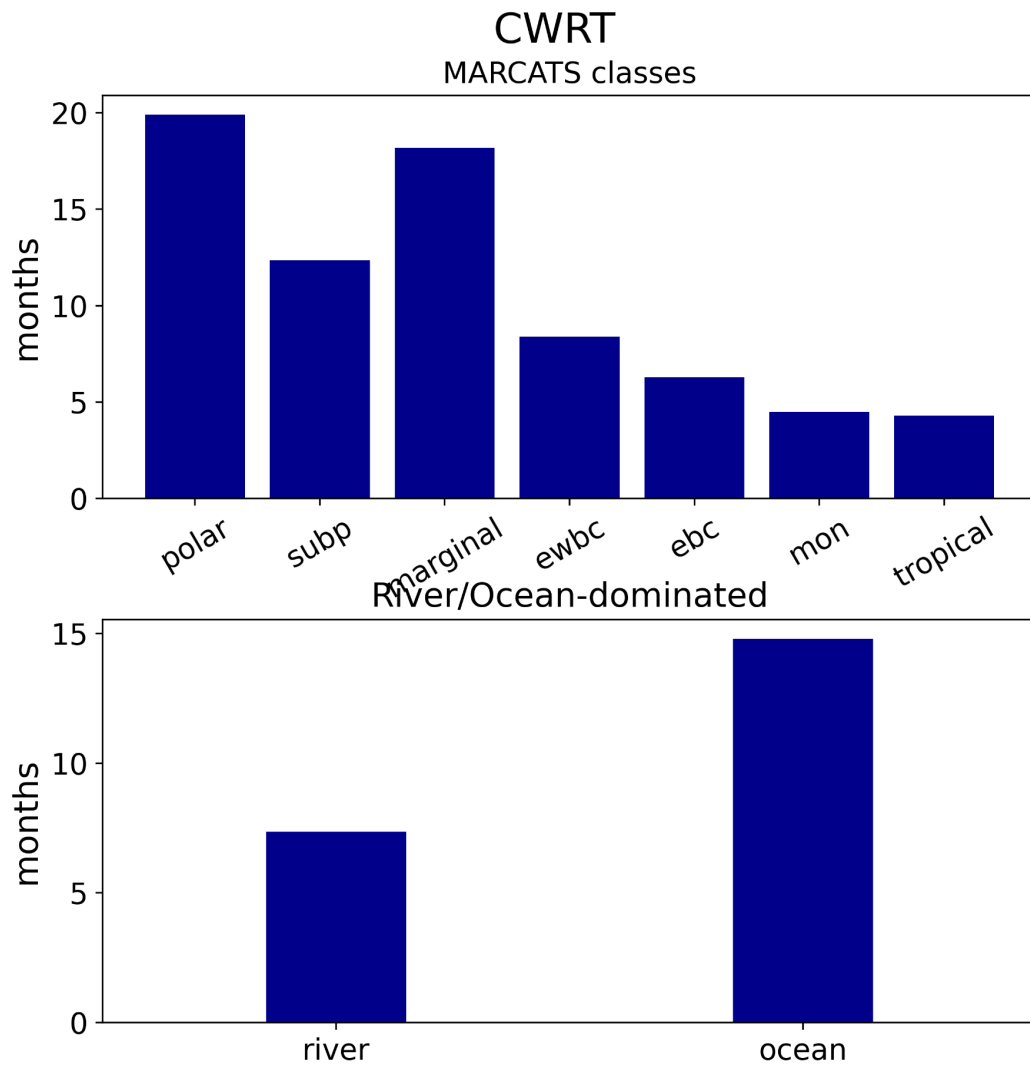

**Supplement Figure S8. Coastal water residence times (CWRTs) for coastal ocean classes.**

Simulated CWRTs for major high-level MARCATS coastal classes: eastern boundary current (ebc), western boundary current (ewbc), monsoonal (mon), subpolar (subp), polar, marginal and tropical as defined in Laruelle et al. (2013) based on catchment properties. Panel c and d show the same variables for defined river/open ocean-dominated shelves. We thereby computed these from inert tracer HAMOCC simulations (Lacroix et al., 2021).
