# Supplementary material for: Rapid Warming, Acidification, Greening and Deoxygenation in the Global Coastal Ocean
Source: Research Square preprint supplement (doi:10.21203/rs.3.rs-8095752/v1), 2025-12-19
Supplement: Supplementary file 1 [file f8c817e206dd57091a865c30.xlsx]

## Sheet: lacroix_ncc_SupplementTablesS1-
Supplement Table S1. Computed global changes from model and observational Products
	SST Change 1980-2022 [°C ]		H+ Change 1980-2022 10^-9 [M]		NPP Change 1980-2022[Pg C yr-1 ]		O2 Change 1980-2022[°C ]
Models/Observational Products	Coastal	Open Ocean	Coastal	Open Ocean	Coastal	Open Ocean	Coastal	Open Ocean
HAMOC-RIVER ALL	0.6813	0.3522	1.3213	0.70419	0.35171	1.3694	-0.0388	-0.02457
ICON-COAST ALL	0.7752	0.34856	1.341	1.0642	0.46556	4.8	-0.0756	-0.04351
ESA CCI L4	0.718	0.47
NOAA SST	0.5922	0.53609
HadISST	0.6519	0.31135
COBEsst	0.5826	0.4231
CMEMS-LSCE			1.1576	0.6121
OceanSODA-ETHZ			1.2753	0.5912
VGPM-Standard					0.61733	0.03762 **
Ito 2022							-0.08271	-0.05762
Ito et al., 2024							-0.185	-0.0757
Observation and Model Mean	0.666867	0.406883	1.2738	0.742922	0.4782		-0.0955275	-0.05035
Standard Deviation	0.0676499	0.0779525	0.0711983	0.190298	0.108807		0.0542788	0.0187541
						** means a non significant trend

## Sheet: Supplement Table 2
Supplement Table S2. Computed global averages from model and observational products
	SST Average 1975-1985[°C ]		H+ Average 1975-1985 10^9 [M]		NPP Average 1975-1985 [Pg C yr-1 ]		O2 Average 1975-1985 [mg O2 l-1]
Models/Observational Products	Coastal	Open Ocean	Coastal	Open Ocean	Coastal	Open Ocean	Coastal	Open Ocean
HAMOC-RIVER ALL	12.5623	17.9738	8.2178	8.5381	3.71803	43.94	0.19749
ICON-COAST ALL	12.8878	12.8878	8.0045	7.7639	4.50423	42.81	0.17052
NOAA SST	16.9387	16.9428
HadISST	14.8307	17.4849
COBEsst	13.6528	16.4247
CMEMS-LSCE			7.56772	9.9312
OceanSODA-ETHZ			7.63394	7.7612
VGPM-Standard					4.6823	43.82
Ito et al. 2019							0.25682
Observation and Model Mean	14.1745	16.3428	7.85599	8.4986	4.30152	43.5233	0.208277
Relative Change 1980-2022	0.0470471

## Sheet: Supplement Table 3
Supplement Table S3. Attribution of global trends based on sequential simulations
			SST trend 1980-2020 [°C]					H+ trend 1980-2020[10^9 M]					NPP trend 1980-2020 [Pg C yr-1]					O2 trend 1980-2020 [mg O2 l-1]
Simulations	HAMOCC-RIVER	ICON-COAST	Model Average	Relative Model Absolute Change	Total Change from observation/model mean	HAMOCC-RIVER	ICON-COAST	Model Average	Percent of absolute change	Total Change from observation/model mean	HAMOCC-RIVER	ICON-COAST	Model Average	Percent of absolute change	Total Change from observation/model mean	HAMOCC-RIVER	ICON-COAST	Model Average	Percent of absolute change	Total Change from observation/model mean
CO2-only simulation	0	0	0	0		1.4689	1.48756	1.47823	0.902593	1.15063	0	0	0	0	0	0.0006	0	0.0003	0.00468055	-0.000446057
Climate-induced	0.6813	0.7752	0.72825	1	0.65664	-0.16005	-0.146158	-0.153104	0.0934838	0.119173	0.1316	0.2256	0.1786	0.437076	0.20901	-0.04466	-0.0756	-0.06013	0.938139	-0.0894046
ClimCO2	0.6813	0.7752	0.72825			1.30885	1.3414	1.32512			0.1316	0.2256	0.1786			-0.04406	-0.0756	-0.05983
River-induced	0	0	0	0	0	0.01245	-0.0004	0.006025	0.00367881	0.00468975	0.2201	0.23995	0.230025	0.562924	0.26919	0.00526	-0.00207	0.001595	0.0248849	-0.00237153
RivClimCO2	0.6813	0.7752	0.72825			1.3213	1.341	1.33115			0.3517	0.46555	0.408625			-0.0388	-0.07767	-0.058235
				0	0									0	0
ALL (Total) CHANGE	0.6813	0.7752	0.72825	1	0.65664	1.6414	1.63412	1.63776	1	1.2748	0.3517	0.46555	0.408625	1	0.4782	0.05052	0.07767	0.064095	1	-0.0953

## Sheet: Supplement Table 4
Supplement Table S4. Trend, correlations and significance of ecosystem stressors with major driver variables
	SST				pH					NPP					O2
Observational Products	Trend [°C ppm-1 CO2]	R2	P-Value		Observational Products	Trend [ 10-9M ppm-1CO2 ]	R2	P-Value		Observational Products	Trend [ g C m-2 yr-1 (Tg N)-1 ]	R2	P-Value		Observational Products	Trend [ mg O2 L-1 ppm-1 CO2 ]	R2	P-Value
ESA CCI L4	0.00852	0.989	1.1e-45		ETH SODA	0.016848	0.995	3.88e-97		VGPM-Standard	2.252	0.977			Ito2022	-0.00141	0.94	5.38e-26
NOAA SST	0.00701107	0.983	1.1e-40		LSCE	0.0144337	0.99	2.33e-86							Itoetal.2024	-0.00321	0.988	1.85e-40
HadISST	0.00811679	0.995	7.98e-52
COBESST	0.00709778	0.992	2.57e-47			0.0156408					2.252					-0.00231
Observational Mean	0.00768641
Models					Models	0.0163692	0.993	3.05e-75		Models	1.66	0.992	3.04e-75		Models	-0.00039	0.755	6.47e-12
HAMOCC	0.00816015	0.98	9.9e-08		HAMOCC	0.017044	0.995	1.95e-79		HAMOCC	2.06	0.985	1.95e-79		HAMOCC	-0.001021	0.892	5.619e-18
ICON	0.00948688	0.983	1.59e-31		ICON	0.0167066				ICON	1.86				ICON	-0.0007055
Model Mean	0.00882352				Model Mean	0.0166086				Model Mean	2.06				Model Mean	-0.0012155
Total Median	0.00811679				Total Median	0.0160614				Total Median	1.96				Total Median	-0.00150775
Total Mean	0.00824228				Total Mean	0.00119414				Total Mean	0.302029				Total Mean	0.00121017
Total Standard Deviation	0.00100484				Total Standard Deviation					Total Standard Deviation					Total Standard Deviation

## Sheet: Supplement Table5
Supplement Table S5. Ecosystem Stressor Trends from regional estimates
	SST [°C] increase 1980-2022	Standard Error	Estimated Shelf Area [10^3 km^2]	Reference Authors	Reference DOI / Link
Gulf of Alaska	0.924	0.126	461	Danielson et al., 2022	https://doi.org/10.1016/j.dsr2.2022.105155
Barents Sea	1.038	0.110417	1727	Isaksen et al., 2022	https://www.nature.com/articles/s41598-022-13568-5
Baltic Sea	2.52	0.103231	383	Zalewska et al., 2024	https://www.sciencedirect.com/science/article/pii/S0078323423000817
North Sea	1.554	0.328	1112	Hoyer et al., 2016	https://journals.ametsoc.org/view/journals/clim/29/7/jcli-d-15-0663.1.xml
NewFoundland	0.966	0.42	395	Kessler et al., 2022	https://www.sciencedirect.com/science/article/pii/S0079661122001616
Scotian Shelf	1.134	0.462	395	Kessler et al., 2022	https://www.sciencedirect.com/science/article/pii/S0079661122001616
Northeastern US	1.386	0.336	395	Kessler et al., 2022	https://www.sciencedirect.com/science/article/pii/S0079661122001616
South Eastern US	0.882	0.252	858	Kessler et al., 2022	https://www.sciencedirect.com/science/article/pii/S0079661122001616
California Current System	1.05	None provided	214	Di Lorenzo et al., 2005	https://doi.org/10.1175/JPO-2690.1
Bohei Sea	0.121579	None provided	1299
East China Sea	1.26	None prodived	1299	Ding et al., 2024	https://doi.org/10.3389/fmars.2024.1452125
Chesapeake Bay	0.84	0.84	395	Hinson et al., 2021	https://onlinelibrary.wiley.com/doi/10.1111/1752-1688.12916
Northern Bay of Bengal	0.5	None provided	230	Massud-UI-Allam et al., 2022	https://doi.org/10.1117/1.JRS.16.018502
Louisiana Shelf	1.134	0.21	544	Kessler et al., 2022	https://www.sciencedirect.com/science/article/pii/S0079661122001616
Carribean Seas	0.924	0.126	344	Kessler et al., 2022	https://www.sciencedirect.com/science/article/pii/S0079661122001616
North Brazil Shelf	0.714	0.126	517	Kessler et al., 2022	https://www.sciencedirect.com/science/article/pii/S0079661122001616
East Brazil Shelf	0.168	0.126	517	Kessler et al., 2022	https://www.sciencedirect.com/science/article/pii/S0079661122001616
South Brazil Shelf	0.546	0.294	521	Kessler et al., 2022	https://www.sciencedirect.com/science/article/pii/S0079661122001616
Patagonian Shelf	-0.042	0.252	1230	Kessler et al., 2022	https://www.sciencedirect.com/science/article/pii/S0079661122001616
Benguela	0.252	0.21	143	Kessler et al., 2022	https://www.sciencedirect.com/science/article/pii/S0079661122001616
Guinea Current	0.798	0.21	308	Kessler et al., 2022	https://www.sciencedirect.com/science/article/pii/S0079661122001616
Canary Current	0.084	0.21	225	Kessler et al., 2022	https://www.sciencedirect.com/science/article/pii/S0079661122001616
Iberian Coast	0.798	0.252	283	Kessler et al., 2022	https://www.sciencedirect.com/science/article/pii/S0079661122001616
Bay of Biscay	1.092	0.21	283	Kessler et al., 2022	https://www.sciencedirect.com/science/article/pii/S0079661122001616
Celtian Coast	1.05	0.21	112	Kessler et al., 2022	https://www.sciencedirect.com/science/article/pii/S0079661122001616
Norwegian Sea	4.284	0.966	171	Kessler et al., 2022	https://www.sciencedirect.com/science/article/pii/S0079661122001616
Okhotsk Sea	1.5	None Given	992	Shiomoto et al., 2025	https://www.sciencedirect.com/science/article/pii/S0924796325000156
Red Sea	1.16	None Given	190	Shaltout 2019	https://www.sciencedirect.com/science/article/pii/S0078323419300442
Average	1.02277	0.289984
Regional STD	0.828886
	H+ [10-9 M yr-2] increase 1980-2022
	Mean	Standard Error	Shelf Area [10^3 km^2]	Reference Authors	Reference DOI / Link
Beaufort Sea	4.872e-09	None provided	1082	Caero et al., 2025	https://agupubs.onlinelibrary.wiley.com/doi/full/10.1029/2024GB008249
Baltic Sea	1.79344e-09	None provided	383	Fransner et al., 2022	https://bg.copernicus.org/articles/19/979/2022/bg-19-979-2022.pdf
North Sea	2.12349e-09	8.25342e-10	1112	Omar et al., 2019	https://agupubs.onlinelibrary.wiley.com/doi/full/10.1029/2018JG004992
Mediterranean	2.64697e-09	2.7e-10	580
Gulf of Maine	-4.64597e-09	Non Provided	395	Stewart et al., 2025	https://www.nature.com/articles/s41598-024-84537-3
California Current System	1.26893e-09	7.52103e-11	214	Wolfe et al., 2023	https://www.nature.com/articles/s43247-023-01065-0
East China Sea	3.27431e-09	7.92035e-10	1299	Tsao et al., 2023	https://www.sciencedirect.com/science/article/pii/S0025326X22011535
Chesapeake Bay	1.64814e-09	None provided	11	Waldbusser et al., 2010	https://link.springer.com/article/10.1007/s12237-010-9307-0
Northern Bay of Bengal	2.74656e-09	None provided	230	Sarma et al., 2021	https://agupubs.onlinelibrary.wiley.com/doi/full/10.1029/2021GL095159
Louisiana Shelf	1.4747e-09	1.39061e-10	544	Jiang et al., 2024	https://agupubs.onlinelibrary.wiley.com/doi/full/10.1029/2023GL106300
Great Barrier Reef	1.38599e-09	7.74006e-10	34
South Brazil Shelf	1.54556e-09	None provided	521	Carvalho-Borges et al. (2018)	https://doi.org/10.1016/j.jmarsys.2018.06.008
Patagonian Shelf	1.45246e-09	Non provided	1230	Orselli et al., 2018	https://doi.org/10.1029/2018GB006154
Average	1.96242e-09	5.21131e-10
Regional STD	2.14853e-09

## Sheet: Supplement Table S6
Supplement Table S6. Calculations for future estimation
Driver Increases
SSP scenario	Atmospheric CO2 [ppm]	Global River N [Tg N yr-1]
SSP1	26.52	2
SSP2	173.8	13
SSP3	250.7	18
SSP4	240.1	15
SSP5	703.8	13
Projections
		SST	pH	NPP	O2
SSP1	Min	0.190463	0.394281	1.96878	0.00789194
	Max	0.24376	0.457618	4.21322	0.0720791
	Median	0.215257	0.44046	3.18	0.0322351
SSP2
	Min	1.24821	2.58394	12.7971	0.0517202
	Max	1.59749	2.99902	26.2289	0.472374
	Median	1.4107	2.88658	20.67	0.211254
SSP3
	Min	1.80049	3.72723	17.7191	0.0746045
	Max	2.30432	4.32598	36.3169	0.681381
	Median	2.03488	4.16378	28.62	0.304726
SSP4
	Min	1.72436	3.56964	14.7659	0.0714501
	Max	2.20689	4.14307	30.2641	0.652571
	Median	1.94884	3.98773	23.85	0.291842
SSP5
	Min	5.05459	10.4636	12.7971	0.20944
	Max	6.46901	12.1445	26.2289	1.91287
	Median	5.7126	11.6891	20.67	0.855469

## Sheet: Supplement Table 7
Supplement Table S7. MARCATs regions and classes.
MARCAT Number	Name	MARCATS Classification	River/Ocean Dominated
1	North-eastern Pacific	Subpolar	Ocean
2	California Current	Eastern Boundary Current	Ocean
3	Tropical Eastern Pacific	Tropical	Ocean
4	Peruvian Upwelling Current	Eastern Boundary Current	Ocean
5	South America	Subpolar	Ocean
6	Brazilian Current	Western Boundary Current	Ocean
7	Tropical Western Atlantic	Tropical	River
8	Caribbean Sea	Tropical	Ocean
9	Gulf of Mexico	Marginal	Ocean
10	Florida Upwelling	Western Boundary Current	Ocean
11	Sea of Labrador	Subpolar	Ocean
12	Hudson Bay	Marginal	Ocean
13	Canadian Archipelagos	Polar	Ocean
14	Northern Greenland	Polar	Ocean
15	Southern Greenland	Subpolar	Ocean
16	Norwegian Basin	Subpolar	Ocean
17	North-eastern Atlantic	Marginal	River
18	Baltic Sea	Marginal	River
19	Iberian Upwelling	Eastern Boundary Current	Ocean
20	Mediterranean Sea	Marginal	River
21	Black Sea	Marginal	River
22	Moroccan Upwelling	Eastern Boundary Current	Ocean
23	Tropical Eastern Atlantic	Tropical	Ocean
24	South-western Africa	Eastern Boundary Current	Ocean
25	Agulhas Current	Western Boundary Current	Ocean
26	Tropical Western Indian	Tropical	Ocean
27	Western Arabian Sea	Monsunal	Ocean
28	Red Sea	Marginal	River
29	Persian Gulf	Marginal	River
30	Eastern Arabian Sea	Monsunal	Ocean
31	Northern Bay of Bengal	Monsunal	River
32	Tropical Eastern Indian	Tropical	River
33	Leeuwin Current	Eastern Boundary Current	Ocean
34	Southern Australia	Subpolar	Ocean
35	Eastern Australia Current	Western Boundary Current	Ocean
36	New Zealand	Subpolar	Ocean
37	Northern Australia	Tropical	Ocean
38	South East Asia	Tropical	River
39	China Sea and Kuroshio	Western Boundary Current	River
40	Sea of Japan	Marginal Sea	River
41	Sea Okhotsk	Marginal Sea	Ocean
42	North-western Pacific	Subpolar	Ocean
43	Siberian Shelves	Polar	River
44	Barents and Karra Seas	Subpolar	Ocean
45	Antarctic Shelves	Polar	Ocean
